# Supplementary material
Source: ML conference proceedings conference paper supplement (https://proceedings.mlr.press/v119/liang20c.html)
Supplement: Supplementary file 1 [file liang20c-supp.pdf]

# Supplementary File for Adaptive Droplet Routing in Digital Microfluidic Biochips Using Deep Reinforcement Learning

This file contains supplementary materials for the submitting paper (ID 3297) for ICML 2020.

Fig. 1 and Fig. 2 show the training rewards for agents with varying number of concurrent environments and number of steps for each update. Fig. 3 and Fig. 4 show the results for different percentages of electrode degradation for various DMFB sizes. Recorded videos of the simulations and the biochip experiment are provided in [1].

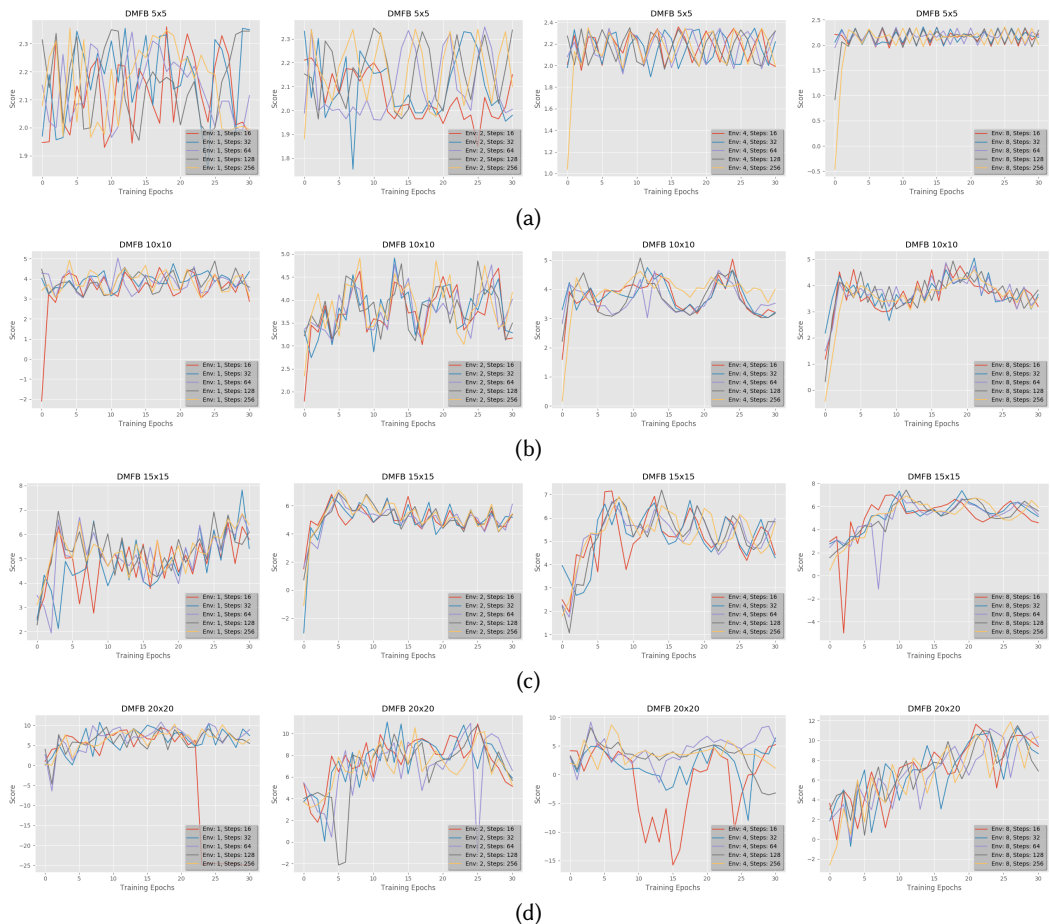

Fig. 1. Training rewards for agents with different hyper-parameter settings. Score is the total reward that the RL agent receives in a game. (a) Training rewards for DMFBs of size  $5 \times 5$  electrodes. (b) Training rewards for DMFBs of size  $10 \times 10$  electrodes. (c) Training rewards for DMFBs of size  $15 \times 15$  electrodes. (d) Training rewards for DMFBs of size  $20 \times 20$  electrodes.

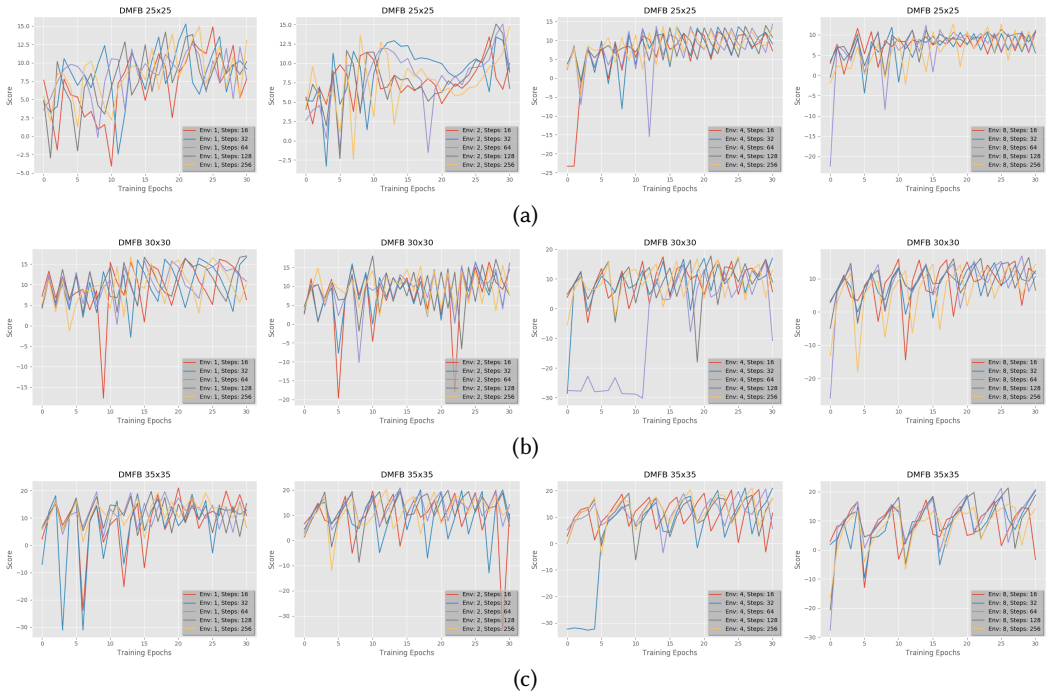

Fig. 2. Training rewards for agents with different hyper-parameter settings. Score is the total reward that the RL agent receives in a game. (a) Training rewards for DMFBs of size  $25 \times 25$  electrodes. (b) Training rewards for DMFBs of size  $30 \times 30$  electrodes. (c) Training rewards for DMFBs of size  $35 \times 35$  electrodes.

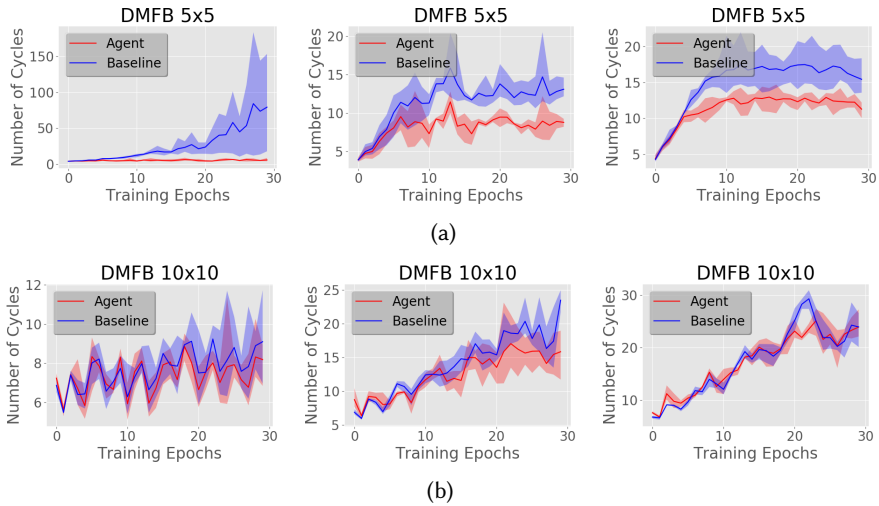

Fig. 3. Evaluation of the trained models in degrading mode of DMFB-Env. The performance, expressed as the required number of actuation (clock) cycles, is compared with the static routing method from [2]. In each sub-figure, three plots (from the left to the right) show 10% of the electrodes degrade over time, 50% of the electrodes degrade over time, and 90% of the electrodes degrade over time, respectively. (a) The performance for DMFBs of size  $5 \times 5$  electrodes. (b) The performance for DMFBs of size  $10 \times 10$  electrodes.

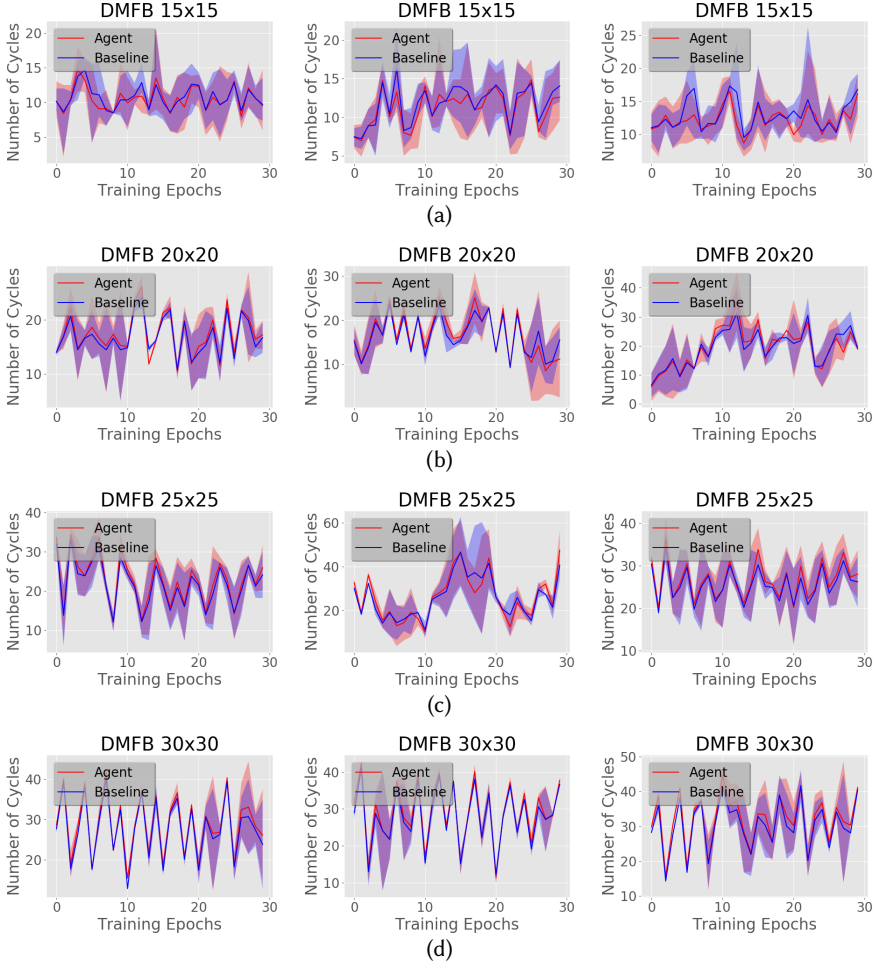

Fig. 4. Evaluation of the trained models in degrading mode of DMFB-Env. The performance, expressed as the required number of actuation (clock) cycles, is compared with the static routing method from [2]. In each sub-figure, three plots (from the left to the right) show 10% of the electrodes degrade over time, 50% of the electrodes degrade over time, and 90% of the electrodes degrade over time, respectively. (a) The performance for DMFBs of size  $15 \times 15$  electrodes. (b) The performance for DMFBs of size  $20 \times 20$  electrodes. (c) The performance for DMFBs of size  $25 \times 25$  electrodes. (d) The performance for DMFBs of size  $30 \times 30$  electrodes.

## REFERENCES

- [1] Authors. 2020. Recorded Videos during Training and Evaluation. [https://drive.google.com/drive/folders/1suM0\\_3GdL1r6\\_65dTjl\\_sA78POKi7hRK?usp=sharing](https://drive.google.com/drive/folders/1suM0_3GdL1r6_65dTjl_sA78POKi7hRK?usp=sharing). [Online; accessed 31-January-2020].
- [2] Yang Zhao and Krishnendu Chakrabarty. 2012. Simultaneous optimization of droplet routing and control-pin mapping to electrodes in digital microfluidic biochips. *IEEE Transactions on Computer-Aided Design of Integrated Circuits and Systems* 31, 2 (2012), 242–254.
